# Supplementary material
Source: PubMed Central journal article supplement (PMC10245388)
Supplement: NIHMS1898535-supplement-Supplementary_material.pdf [file NIHMS1898535-supplement-Supplementary_material.pdf]

---

## Supplementary Appendix

### Loss of long-chain acyl-CoA synthetase 1 promotes hepatocyte death in alcohol-induced steatohepatitis

**Running title:** ACSL1 deficiency mediates ALD

**Authors:** Haibo Dong<sup>a</sup>, Wei Zhong<sup>a, b</sup>, Wenliang Zhang<sup>a</sup>, Liuyi Hao<sup>a</sup>, Wei Guo<sup>a</sup>, Ruichao Yue<sup>a</sup>, Xinguo Sun<sup>a</sup>, Zhaoli Sun<sup>c</sup>, Ramon Bataller<sup>d</sup>, Zhanxiang Zhou<sup>a, b\*</sup>

**Affiliations:** <sup>a</sup>Center for Translational Biomedical Research, the University of North Carolina at Greensboro, North Carolina Research Campus, Kannapolis, NC, USA.

<sup>b</sup>Department of Nutrition, the University of North Carolina at Greensboro, Greensboro, NC, USA.

<sup>c</sup>Department of Surgery, Johns Hopkins University School of Medicine, Baltimore, MD, USA.

<sup>d</sup>Department of Medicine, University of Pittsburgh, Pittsburgh, PA, USA

\* **Corresponding author:** Zhanxiang Zhou, Center for Translational Biomedical Research, University of North Carolina at Greensboro, North Carolina Research Campus, 600 Laureate Way, Suite 2203, Kannapolis, North Carolina 28081. Phone: 704-250-5800. Fax: 704-250-5809. E-mail: z\_zhou@uncg.edu.

---

## Supplementary material contents

|                                    |           |
|------------------------------------|-----------|
| <b>Supplementary Figures .....</b> | <b>3</b>  |
| Supplementary Fig. S1. . . . .     | 3         |
| Supplementary Fig. S2. . . . .     | 4         |
| Supplementary Fig. S3. . . . .     | 6         |
| Supplementary Fig. S4. . . . .     | 8         |
| Supplementary Fig. S5. . . . .     | 10        |
| Supplementary Fig. S6. . . . .     | 12        |
| <b>Supplementary Tables .....</b>  | <b>14</b> |
| Supplementary Table 1. . . . .     | 14        |
| Supplementary Table 2. . . . .     | 15        |

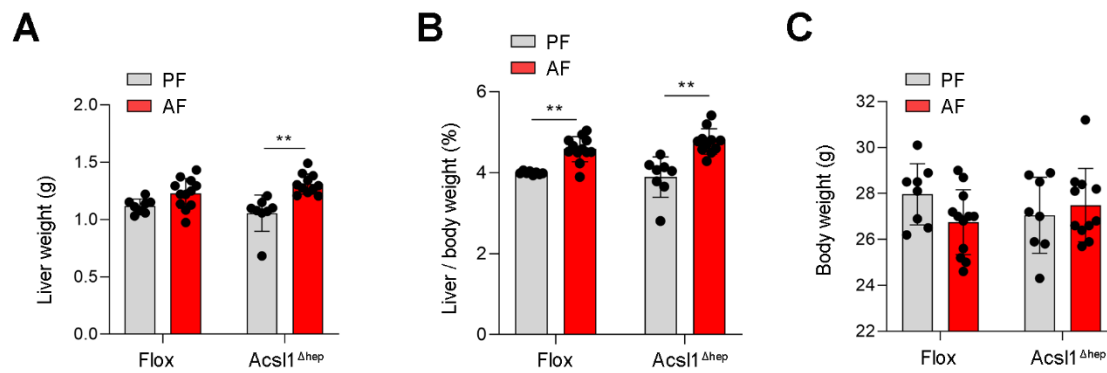

**Supplementary Fig. S1 Effect of hepatocyte-specific ACSL1 deletion on liver weight, body weight, and the ratio of liver weight to body weight.** (A) Changes in liver weight, (B) liver weight to body weight ratio, and (C) body weight (n = 8-12/group). Data are presented as mean  $\pm$  SD. \*\* $P < 0.01$ .

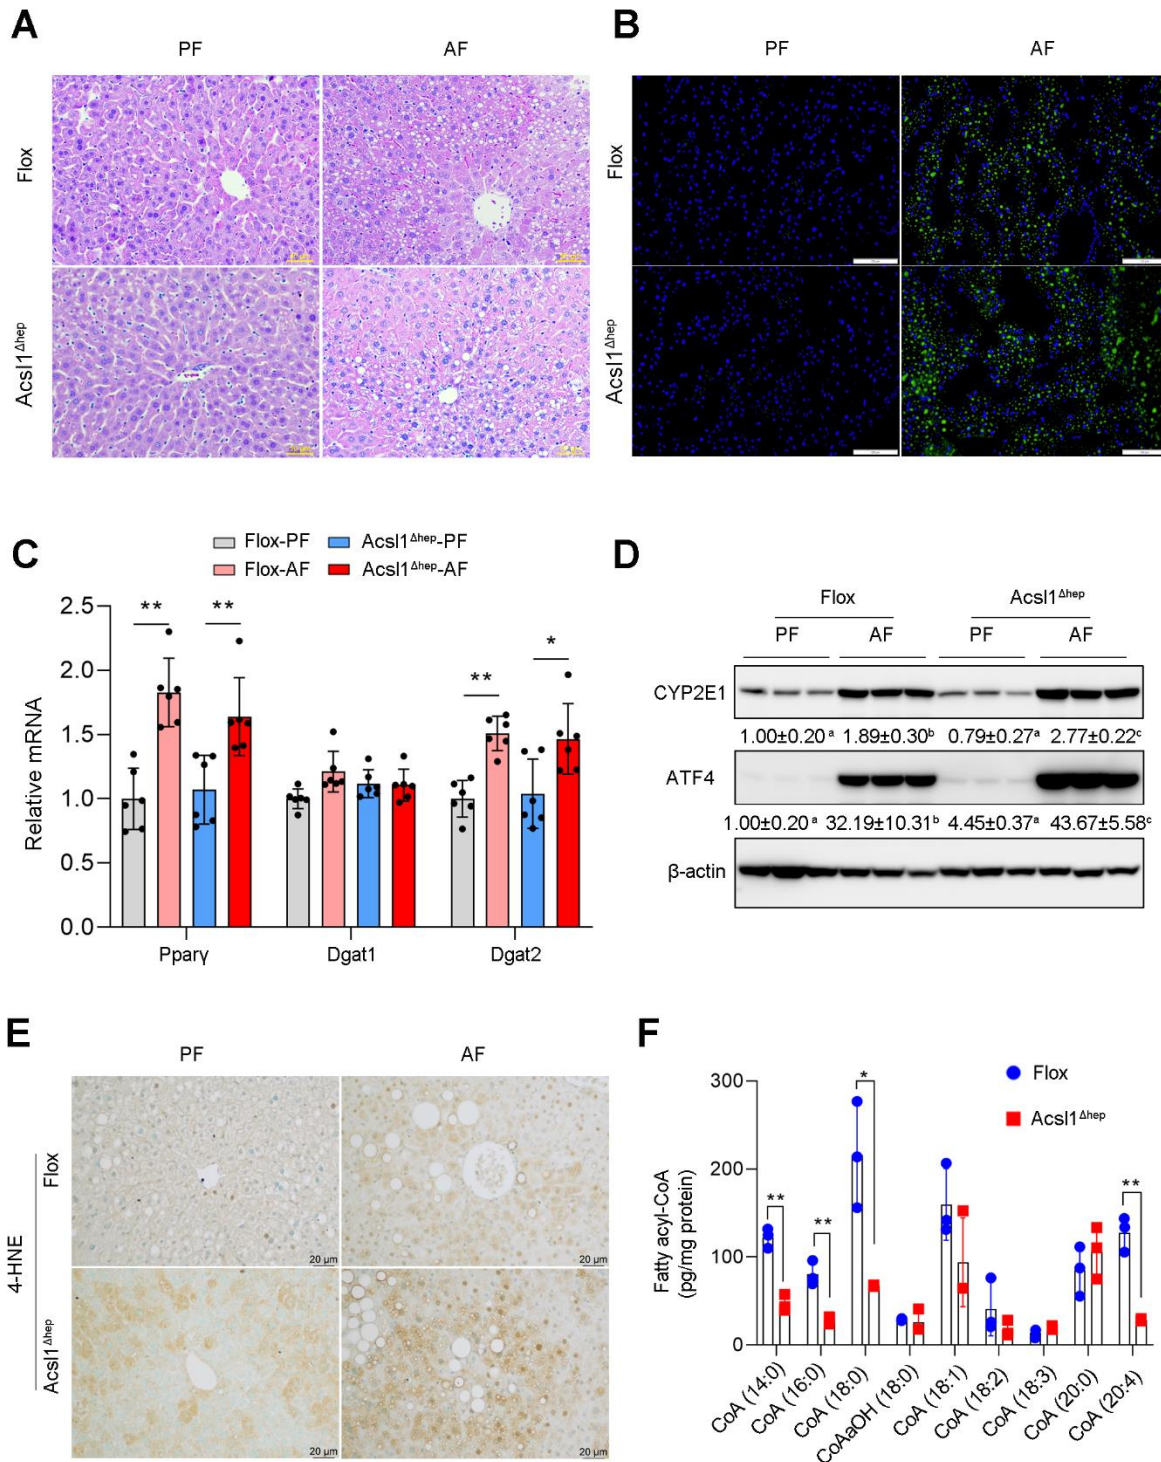

**Supplementary Fig. S2 ACSL1 deficiency induces fatty acids accumulation and promotes oxidative damage in mouse liver.** (A) Representative H&E staining of the liver sections of alcohol-fed mice from Flox mice and *Acs11*<sup>Δhep</sup> mice. Scale bars = 50 μm. (B) Representative BODIPY staining of neutral lipids of the liver sections of alcohol-fed mice from Flox mice and *Acs11*<sup>Δhep</sup> mice. Scale bars = 100 μm. (C) The mRNA levels of *Ppar* γ, *Dgat1*, and *Dgat2* in liver tissues of alcohol-fed Flox mice and *Acs11*<sup>Δhep</sup> mice (n = 6/group). (D) The protein levels of CYP2E1 and ATF4 (n = 3/group). (E) IHC staining of hepatic 4-HNE from Flox mice and *Acs11*<sup>Δhep</sup> mice. Scale bars = 20 μm. (F) Lipidomics analysis of fatty acyl-CoA in liver tissues from Flox mice and *Acs11*<sup>Δhep</sup> mice (n = 3/ group). Data are presented as mean ± SD. \**P* < 0.05, \*\**P* < 0.01, values with different superscripts are significantly different.

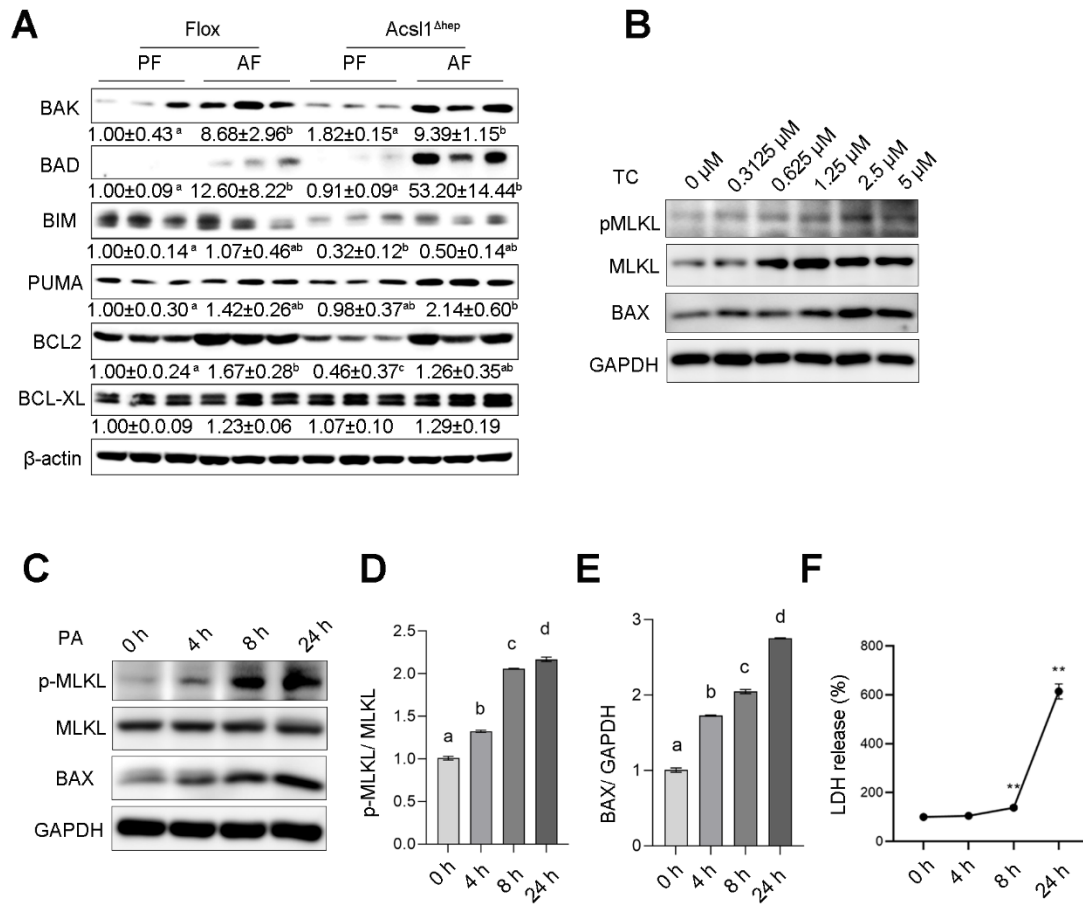

---

**Supplementary Fig. S3 ACSL1 deficiency induces cell apoptosis and necroptosis** (A) Protein levels of apoptotic proteins in the liver from Flox mice and hepatocyte-specific ACSL1 knockout mice (*Acs11*<sup>Δ<sup>hep</sup>) with or without alcohol feeding for 8 weeks. (B) Protein levels of p-MLKL, MLKL, and BAX were analyzed by immunoblot after triacsin-c (TC, an ACSL1 inhibitor) treatment for 24h. (C-E) Protein levels of p-MLKL, MLKL, and BAX were analyzed by immunoblot under PA stimulation for 0 h, 4 h, 8 h, and 24 h (C). Quantification of p-MLKL (D) and BAX (E). (F) LDH release from Hepa-1c1c7 cells was determined in culture medium after PA stimulation for 0 h, 4 h, 8 h, or 24 h. Data are presented as mean ± SD. \*\**P* < 0.01, values with different superscripts are significantly different.</sup>

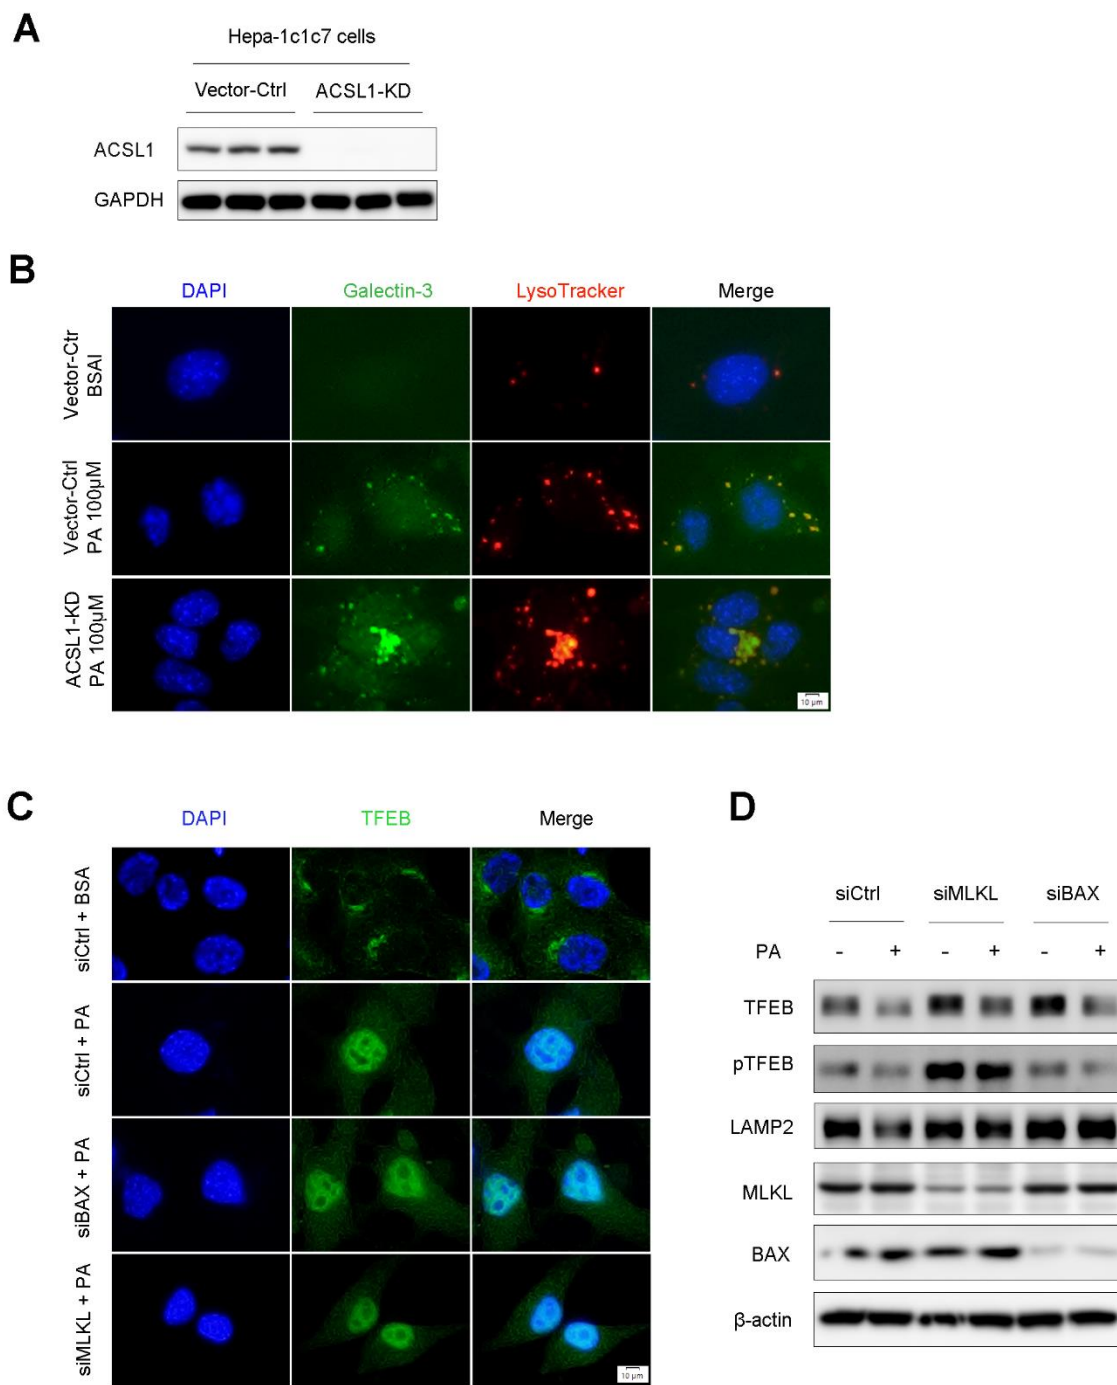



---

**Supplementary Fig. S4 ACSL1 knockdown aggravates PA-induced lysosome dysfunction, but Bax and MLKL do not mediate lysosome biogenesis.** (A) Protein levels of ACSL1 were confirmed in ACSL1 knockdown Hepa-1c1c7 cells. (B) Colocalization of galectin-3 and lysosome tracker was examined by immunofluorescence microscopy in Hepa-1c1c7 cells with/without PA (100  $\mu$ M) stimulation for 8 h. Scale bars = 10  $\mu$ m. (C) IF analysis of TFEB nuclear translocation in Hepa-1c1c7 cells after BAX or MLKL knockdown by siRNAs, respectively, followed by PA (100  $\mu$ M) stimulation for 24 h. Scale bars = 10  $\mu$ m. (D) Western blot analysis of lysosome biogenesis in Hepa-1c1c7 cells after BAX or MLKL knockdown by siRNAs, respectively, followed by PA (100  $\mu$ M) stimulation for 24 h.

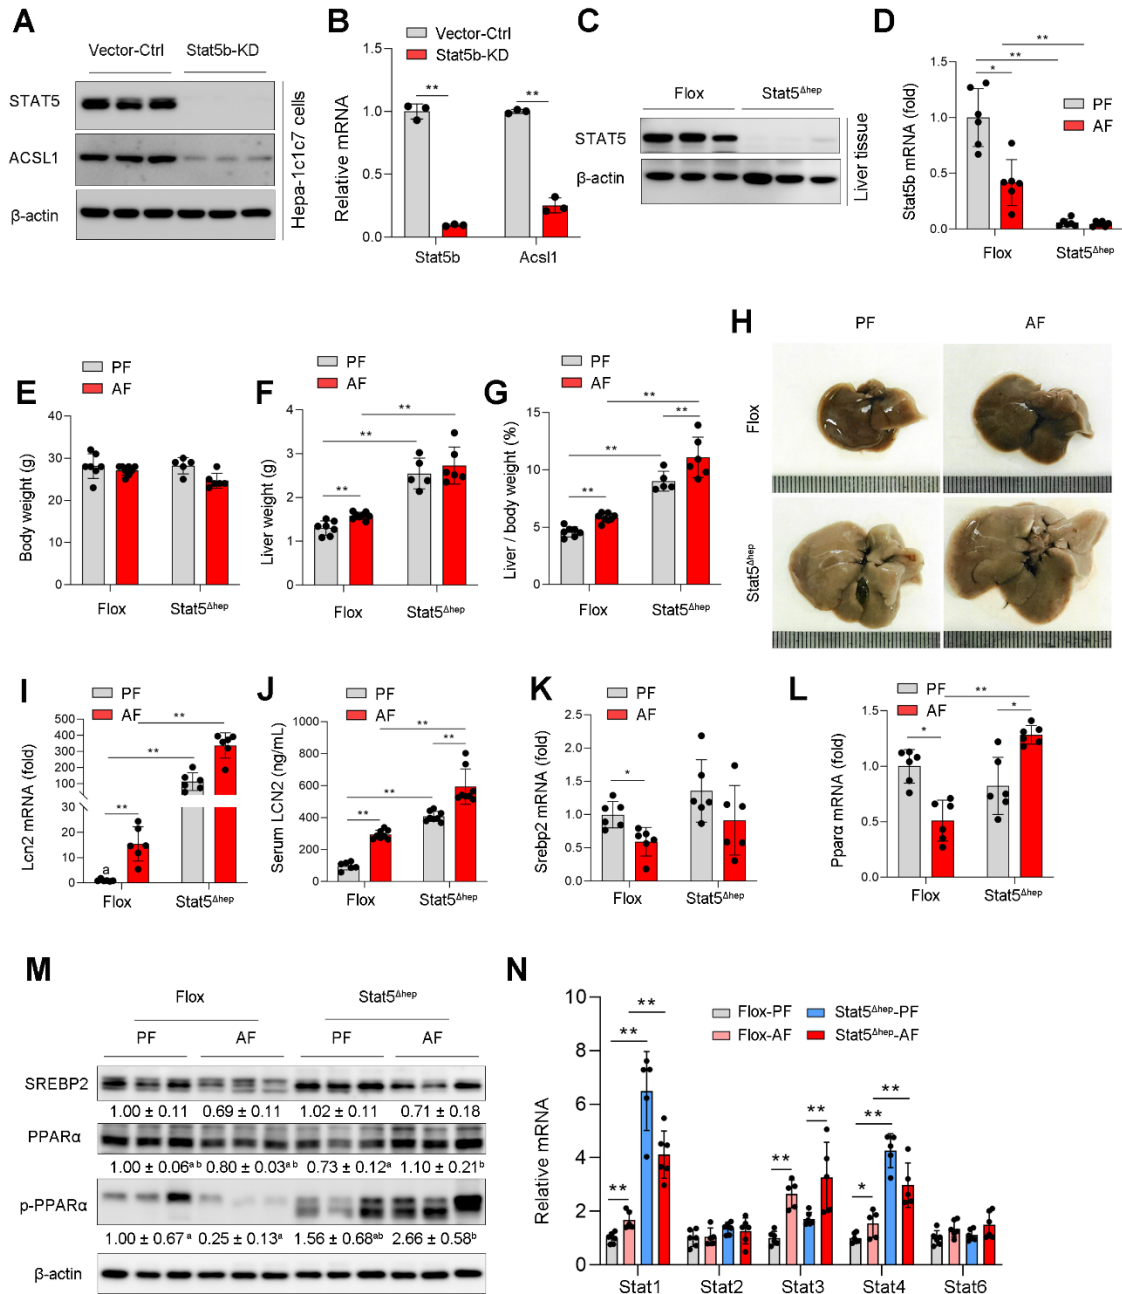

---

**Supplementary Fig. S5 Hepatocyte-specific STAT5 Deletion Exacerbates Alcohol-induced Liver Injury.** (A) Western blot analysis of ACSL1 after STAT5b knockout in Hepa-1c1c7 cells (n = 3/group). (B) qPCR analysis of ACSL1 after STAT5b knockout in Hepa-1c1c7 cells (n = 3/group). (C) Western blot analysis of STAT5 in liver tissues of Flox mice and Stat5<sup>Δhep</sup> mice (n = 6/group, 3 replicates). (D) qPCR analysis of STAT5 in liver tissues of Flox mice and Stat5<sup>Δhep</sup> mice (n = 6/group). (E-G) Body weight (E), liver weight (F), and liver weight to body weight ratio (G) (n = 5-7/group). (H) Representative liver images of Flox and Stat5<sup>Δhep</sup> mice with/without alcohol feeding for 8 weeks. (I) Hepatic mRNA expression of *Lcn2* in Flox mice and Stat5<sup>Δhep</sup> mice with/without alcohol feeding for 8 weeks (n = 6/group). (J) Serum LCN2 levels in Flox mice and Stat5<sup>Δhep</sup> mice with/without alcohol feeding for 8 weeks (n = 6-8/group). (K) Hepatic mRNA expression of *Srebp2* in Flox mice and Stat5<sup>Δhep</sup> mice with/without alcohol feeding for 8 weeks (n = 6/group). (L) Hepatic mRNA expression of *PPARα* in Flox mice and Stat5<sup>Δhep</sup> mice with/without alcohol feeding for 8 weeks (n = 6/group). (M) Western blot analysis of SREBP2, PPARα and p-PPARα in liver tissues of Flox mice and Stat5<sup>Δhep</sup> mice (n = 6/group, 3 replicates). (N) mRNA levels of *Stat1*, *Stat2*, *Stat3*, *Stat4*, and *Stat6* in liver tissues of alcohol-fed Flox mice and Stat5<sup>Δhep</sup> mice, (n = 5-6/group). Data are presented as mean ± SD, \**P* < 0.05, \*\**P* < 0.01, values with different superscripts are significantly different.

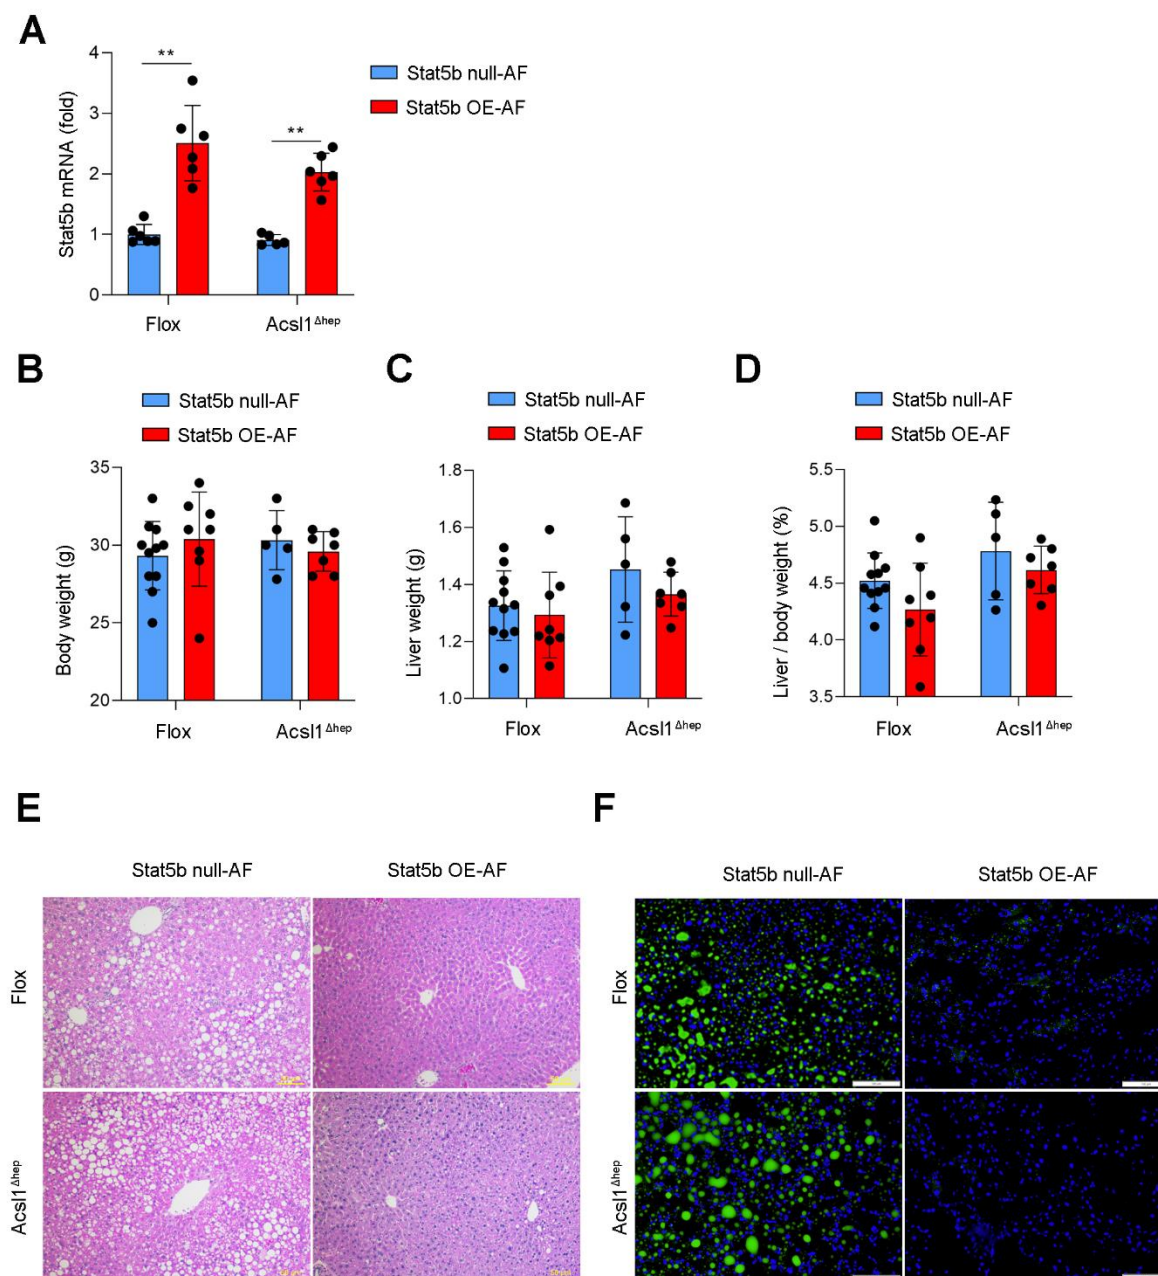

---

**Supplemental Fig. S6 STAT5b overexpression ameliorates alcohol-induced TG accumulation. (A)** qPCR analysis of Stat5b in liver tissues of alcohol-fed mice from Flox mice and Acs11<sup>Δhep</sup> mice with/without Stat5b overexpression (n =5-6/group). **(B-D)** Body weight (B), liver weight (C), and liver weight to body weight ratio (D) (n = 5-7/group). **(E)** Representative H&E staining of the liver sections of alcohol-fed mice from Flox mice and Acs11<sup>Δhep</sup> mice with/without Stat5b overexpression. Scale bars = 50 μm. **(F)** Representative BODIPY staining of neutral lipids of the liver sections of alcohol-fed mice from Flox mice and Acs11<sup>Δhep</sup> mice with/without Stat5b overexpression. Scale bars = 100 μm. Data are presented as mean ± SD, \**P* < 0.05, \*\**P* < 0.01.

**Supplementary Key Resources Table 1. Primer sequences for real-time PCR in mouse samples.**

| <b>Genes</b>                    | <b>Forward</b>           | <b>Reverse</b>          |
|---------------------------------|--------------------------|-------------------------|
| <b>Acs11</b>                    | AGGACTCGGCATGTGACAAA     | ACACCGCAGCAGAATCAGAA    |
| <b>Acs13</b>                    | CCTGTCAGTTCCAAACCGGA     | CCAAAGTCAAGGGCTCGGAT    |
| <b>Acs14</b>                    | AGAGTCCAAAGCGAGGGAGA     | TCTCTCCAGTTCCCAAACGC    |
| <b>Acs15</b>                    | TTAAACTTGGCGGGGTGAGA     | CTGTGTAGCTCCTTTCGCCA    |
| <b>Cpt1<math>\alpha</math></b>  | CTCCGCCTGAGCCATGAAG      | CACCAGTGATGATGCCATTCT   |
| <b>Cyp4a10</b>                  | TTCCAGCAGTTCCCATCACC     | ACGCACCATTAGCCTTTGGA    |
| <b>Cyp4a12</b>                  | CAAGACAGCCCAGCTCTACC     | TGAATGCGCACTTTGCTTCC    |
| <b>Cyp4a14</b>                  | CTGGGTGATGGAACCTCTGTC    | TCCAATGCAGTTCCTTGATCC   |
| <b>Acox1</b>                    | CGCACATCTTGGATGGTAGT     | GGCTTCGAGTGAGGAAGTTATAG |
| <b>Srebp2</b>                   | GCAGCAACGGGACCATTCT      | CCCCATGACTAAGTCCTTCAACT |
| <b>Ppara</b>                    | AGAGCCCCATCTGTCCTCTC     | ACTGGTAGTCTGCAAAACCAAA  |
| <b>Cd36</b>                     | ATGGGCTGTGATCGGAACTG     | GTCTTCCAATAAGCATGTCTCC  |
| <b>Stat5b</b>                   | GTACTACACACCGGTCCCCT     | CCCCTGGTATCAAGGACGG     |
| <b>Ppar <math>\gamma</math></b> | GAACCTGCATCTCCACCTTATT   | TGGAAGCCTGATGCTTTATCC   |
| <b>Dgat1</b>                    | TCCGCCTCTGGGCATTC        | GAATCGGCCCAACAATCCA     |
| <b>Dgat2</b>                    | CTGGCTGATAGCTGCTCTCTACTT | TGTGATCTCCTGCCACCTTTC   |
| <b>Stat1</b>                    | TGGCCCTGATGGTCTTATTC     | GGGAGCTCTCACTGAATCTAAG  |
| <b>Stat2</b>                    | CTGGTAAGATCCCTTTCTGGAC   | GCTCCACCCAAGAACAAGTA    |
| <b>Stat3</b>                    | GTCCTCTATCAGCACAACTTC    | TCCAACATCTGCTGCTTCTC    |
| <b>Stat4</b>                    | CCTGCGAGACTACAAGGTTATC   | GGAGAAGGTCTGAAGGAGATTG  |
| <b>Stat6</b>                    | GGCTTTCCGGAGTCACTATAAG   | TGGATGGACTGTGGAGGA      |
| <b>RPS17</b>                    | GGAGATCGCCATTATCCCCA     | ATCTCCTTGGTGTGGGATC     |

---

**Supplementary Key Resources Table 2. Key resources in this study**

| REAGENT or RESOURCE                      | SOURCE                    | IDENTIFIER                       |
|------------------------------------------|---------------------------|----------------------------------|
| <b>Antibodies</b>                        |                           |                                  |
| Rabbit polyclonal anti ACSL1             | Cell Signaling Technology | Cat# 4047, RRID: AB_2222411      |
| Rabbit monoclonal anti STAT5             | Cell Signaling Technology | Cat# 9358, RRID: AB_659905       |
| Rabbit polyclonal anti p-STAT5           | Cell Signaling Technology | Cat# 9351S, RRID: AB_2315225     |
| Mouse monoclonal anti MLKL               | Proteintech               | Cat# 66675-1-Ig, RRID:AB_2882029 |
| Rabbit monoclonal anti p-MLKL            | Abcam                     | Cat# ab196436, RRID:AB_2687465   |
| Rabbit polyclonal anti BAX               | Cell Signaling Technology | Cat# 2774, RRID:AB_490806        |
| Mouse monoclonal anti BAX (6A7)          | BD Biosciences            | Cat# 556467, RRID:AB_396430      |
| Rabbit monoclonal anti BIM               | Cell Signaling Technology | Cat# 2933, RRID:AB_1030947       |
| Mouse monoclonal anti BID                | Cell Signaling Technology | Cat# 2006, RRID:AB_2065507       |
| Rabbit polyclonal anti PUMA              | Cell Signaling Technology | Cat# 4976, RRID:AB_2064551       |
| Rabbit monoclonal anti cleaved-caspase 3 | Cell Signaling Technology | Cat# 9579, RRID:AB_10897512      |
| Rabbit monoclonal anti Caspase 8         | Cell Signaling Technology | Cat# 4790, RRID:AB_10545768      |
| Rabbit polyclonal anti BCL-2             | Cell Signaling Technology | Cat# 2876, RRID:AB_2064177       |
| Rabbit monoclonal anti BCL-XL            | Cell Signaling Technology | Cat# 2764, RRID:AB_2228008       |
| Rabbit polyclonal anti CPT1 $\alpha$     | Proteintech               | Cat# 15184-1-AP, RRID:AB_2084676 |
| Rabbit polyclonal anti ACOX1             | Proteintech               | Cat# 10957-1-AP, RRID:AB_2221670 |
| Rabbit polyclonal anti ACOX2             | Thermo Fisher Scientific  | Cat# PA5-50297, RRID:AB_2635750  |
| Mouse monoclonal anti CYP4A              | Santa Cruz Biotechnology  | Cat# sc-271983, RRID:AB_10715105 |
| Rabbit polyclonal anti CYP2E1            | Abcam                     | Cat# ab28146, RRID:AB_2089985    |
| Rabbit monoclonal anti ATF4              | Cell Signaling Technology | Cat# 11815, RRID:AB_2616025      |
| Rabbit polyclonal anti p-PPAR $\alpha$   | Thermo Fisher Scientific  | Cat# PA1-820, RRID:AB_325817     |
| Rabbit polyclonal anti PPAR $\alpha$     | Thermo Fisher Scientific  | Cat# PA1-32484, RRID:AB_1959487  |
| Rabbit polyclonal anti SREBP2            | Abcam                     | Cat# ab30682, RRID:AB_779079     |
| Rabbit monoclonal anti LAMP1             | Cell Signaling Technology | Cat# 3243, RRID:AB_2134478       |

|                                                      |                              |                                              |
|------------------------------------------------------|------------------------------|----------------------------------------------|
| Rat monoclonal anti LAMP2                            | Thermo Fisher Scientific     | Cat# MA1-165,<br>RRID:AB_2609332             |
| Mouse monoclonal anti 4-HNE                          | R and D Systems              | Cat# MAB3249,<br>RRID:AB_664165              |
| Rabbit polyclonal anti MPO                           | LSBio (LifeSpan)             | Cat# LS-B6699-250,<br>RRID:AB_11143601       |
| Mouse monoclonal anti Galectin-3                     | Santa Cruz<br>Biotechnology  | Cat# sc-32790,<br>RRID:AB_627657             |
| Rabbit monoclonal anti Cathepsin B                   | Abcam                        | Cat# ab214428,<br>RRID:AB_2848144            |
| Rat monoclonal anti CD45                             | BioLegend                    | Cat# 103108,<br>RRID:AB_312973               |
| Rat monoclonal anti CD11b                            | BioLegend                    | Cat# 101208,<br>RRID:AB_312791               |
| Rat monoclonal anti Ly6G                             | BioLegend                    | BioLegend Cat#<br>127618,<br>RRID:AB_1877261 |
| Rabbit polyclonal anti $\beta$ -actin                | Abcam                        | Cat# ab70165,<br>RRID:AB_1209525             |
| Rabbit monoclonal anti GAPDH                         | Cell Signaling<br>Technology | Cat# 2118,<br>RRID:AB_561053                 |
| <b>Bacterial and virus strains</b>                   |                              |                                              |
| AAV8-Null vectors                                    | Vector Biolabs               | Cat# 7077                                    |
| AAV8-TBG-Stat5b vectors                              | Vector Biolabs               | Lot.# 210816#41                              |
| Stat5b-Double Nickase Plasmid                        | Santa Cruz<br>Biotechnology  | Cat# SC-423179-Nic-2                         |
| ACSL1-Double Nickase Plasmid                         | Santa Cruz<br>Biotechnology  | Cat# SC-420278-Nic-2                         |
| Control Double Nickase Plasmid                       | Santa Cruz<br>Biotechnology  | Cat# SC-423179                               |
| <b>Chemicals, peptides, and recombinant proteins</b> |                              |                                              |
| Alcohol                                              | Millipore Sigma              | Cat# 64-17-5                                 |
| Sodium Palmitate                                     | Millipore Sigma              | Cat# 408-35-5                                |
| Bax inhibitor peptide V5                             | Millipore Sigma              | Cat# 196810-5mg                              |
| Necrosulfonamide                                     | Selleckchem                  | Cat# S8251                                   |
| 7-AAD                                                | BioLegend                    | Cat# 420404                                  |
| DAPI                                                 | Thermo Fisher Scientific     | Cat# P36935                                  |
| BODIPY 493/503                                       | Thermo Fisher Scientific     | Cat# D3922                                   |
| LysoTracker DND-99                                   | Thermo Fisher Scientific     | Cat# L7528                                   |
| Pierce™ Protein A/G Agarose                          | Thermo Fisher Scientific     | Cat# 20421                                   |
| Lipofectamine 3000                                   | Invitrogen                   | Cat# L3000008                                |
| Collagenase Type IV                                  | Millipore Sigma              | Cat# C4-22-1G                                |
| <b>Critical commercial assays</b>                    |                              |                                              |
| Mouse LCN2 ELISA                                     | R&D systems                  | Cat# MLCN20                                  |
| Lysosome enrichment kit                              | Thermo Fisher Scientific     | Cat# 89839                                   |
| Dual-luciferase reporter assay                       | Promega                      | Cat# E1910                                   |
| ALT assay                                            | Cayman Chemical              | Cat# 700260                                  |
| AST assay                                            | Cayman Chemical              | Cat# 701640                                  |
| Triglyceride assay                                   | Biovision                    | Cat# K622                                    |
| Free fatty acid assay                                | Biovision                    | Cat# K612                                    |



|                                                                                         |                              |                                                                                                   |
|-----------------------------------------------------------------------------------------|------------------------------|---------------------------------------------------------------------------------------------------|
| TUNEL assay                                                                             | Millipore Sigma              | Cat# S7100                                                                                        |
| Seahorse XF Cell Mito Stress Test Kit                                                   | Agilent Technologies         | Cat# 103015-100                                                                                   |
| Seahorse XF Real-time ATP Rate Kit                                                      | Agilent Technologies         | Cat# 103592-100                                                                                   |
| <b>Retrieved data source</b>                                                            |                              |                                                                                                   |
| Gene microarray of human alcoholic hepatitis patient liver tissue                       | NCBI Gene Expression Omnibus | GEO: <a href="#">GSE28619</a>                                                                     |
| RNAseq analysis of human alcoholic hepatitis patient liver tissue                       | NCBI Gene Expression Omnibus | GEO: <a href="#">GSE143318</a>                                                                    |
| <b>Experimental models: Cell lines</b>                                                  |                              |                                                                                                   |
| Mouse: Hepa-1c1c7                                                                       | ATCC                         | Cat# CRL-2026                                                                                     |
| Mouse: STAT5b knockdown of Hepa-1c1c7 cell line                                         | This paper                   | N/A                                                                                               |
| Mouse: Acs11 knockdown of Hepa-1c1c7 cell line                                          | This paper                   | N/A                                                                                               |
| <b>Experimental models: Organisms/strains</b>                                           |                              |                                                                                                   |
| ACSL1 Flox mice                                                                         | Dr. Rosalind Coleman         | N/A                                                                                               |
| STAT5 Flox mice                                                                         | Jackson Laboratory           | Strain #: 032053-JAX                                                                              |
| Albumin-Cre mice                                                                        | Jackson Laboratory           | Strain #: 003574                                                                                  |
| Hepatocyte-specific ACSL1 knockout mice                                                 | This paper                   | N/A                                                                                               |
| Hepatocyte-specific Stat5 knockout mice                                                 | This paper                   | N/A                                                                                               |
| Hepatocyte-specific Stat5b overexpression mice                                          | This paper                   | N/A                                                                                               |
| <b>Oligonucleotides</b>                                                                 |                              |                                                                                                   |
| siRNA of BAX                                                                            | Santa Cruz Biotechnology     | Cat# SC-421913                                                                                    |
| siRNA of MLKL                                                                           | Santa Cruz Biotechnology     | Cat# SC-149468                                                                                    |
| siRNA control                                                                           | Santa Cruz Biotechnology     | Cat# SC-36869                                                                                     |
| Primers for genes see Table S1                                                          | This paper                   | N/A                                                                                               |
| <b>Recombinant DNA</b>                                                                  |                              |                                                                                                   |
| WT clone of mouse ACSL1                                                                 | GeneCooeia.Inc.              | Cat# CS-MPRM39476-pGL3-01                                                                         |
| MUT1 clone of mouse ACSL1 mutant TTCTAAGAA to AACTAAGAA                                 | GeneCooeia.Inc.              | Cat# CS-MPRM39476-pGL3-02                                                                         |
| MUT2 clone of mouse ACSL1 mutant TTCTGGCAA to AACTGGCAA                                 | GeneCooeia.Inc.              | Cat# CS-MPRM39476-pGL3-03                                                                         |
| MUT3 clone of mouse ACSL1 mutant both TTCTAAGAA to AACTAAGAA and TTCTGGCAA to AACTGGCAA | GeneCooeia.Inc.              | Cat# CS-MPRM39476-pGL3-04                                                                         |
| <b>Software and algorithms</b>                                                          |                              |                                                                                                   |
| Flowjo 10.1 software                                                                    | BD Life Sciences             | <a href="https://www.flowjo.com">https://www.flowjo.com</a>                                       |
| GEO dataset analysis software                                                           | HOME for Researchers         | <a href="https://www.aclbi.com/static/index.html#/">https://www.aclbi.com/static/index.html#/</a> |
| Figdraw software                                                                        | HOME for Researchers         | <a href="https://www.figdraw.com">https://www.figdraw.com</a>                                     |
| R software                                                                              | R Core Team                  | <a href="https://www.r-project.org/">https://www.r-project.org/</a>                               |
| TFBIND                                                                                  | T.Tsunoda and T.Takagi,1999  | <a href="https://tfbind.hgc.jp/">https://tfbind.hgc.jp/</a>                                       |

---

|                                          |                  |                                                                                                                       |
|------------------------------------------|------------------|-----------------------------------------------------------------------------------------------------------------------|
| GraphPad Prism 8                         | GraphPad         | <a href="https://www.graphpad.com/">https://www.graphpad.com/</a>                                                     |
| IBM SPSS Statistics                      | IBM              | <a href="http://www.ibm.com/analytics/us/en/technology/spss/">http://www.ibm.com/analytics/us/en/technology/spss/</a> |
| <b>Other</b>                             |                  |                                                                                                                       |
| BD FACSMelody™ Cell Sorter               | BD Life Sciences | N/A                                                                                                                   |
| Promega GloMax 96 Microplate Luminometer | Promega          | Cat# E6521                                                                                                            |
|                                          |                  |                                                                                                                       |
